1 **Grape polyphenols reduce gut-localized reactive oxygen species**  
2 **associated with the development of metabolic syndrome in mice.**

3

4 **Short Title: Grape polyphenols quench reactive oxygen species in the gut**

5 **Peter Kuhn<sup>1</sup>, Hetalben M. Kalariya<sup>1</sup>, Alexander Poulev<sup>1</sup>, David M. Ribnicky<sup>1</sup>, Asha Jaja-**

6 **Chimedza<sup>1</sup>, Diana E. Roopchand<sup>2</sup> and Ilya Raskin<sup>1\*</sup>**

7 <sup>1</sup> Rutgers, The State University of New Jersey, Department of Plant Biology, Foran Hall, 59

8 Dudley Road, New Brunswick, NJ 08901, USA

9 <sup>2</sup> Rutgers, The State University of New Jersey, Department of Food Science, Institute for Food

10 Nutrition and Health, Center for Digestive Health, 61 Dudley Road, New Brunswick, NJ 08901,

11 USA

12

13

14

15 **Abstract**

16 High-fat diet (HFD)-induced leaky gut syndrome combined with low-grade inflammation increase  
17 reactive oxygen species (ROS) in the intestine and may contribute to dysbiosis and metabolic  
18 syndrome (MetS). Poorly bioavailable and only partially metabolizable dietary polyphenols, such  
19 as proanthocyanidins (PACs), may exert their beneficial effects on metabolic health by  
20 scavenging intestinal ROS. To test this hypothesis, we developed and validated a novel,  
21 noninvasive, in situ method for visualizing intestinal ROS using orally administered ROS-sensitive  
22 indocyanine green (ICG) dye. C57BL/6J mice fed HFD for 10 weeks accumulated high levels of  
23 intestinal ROS compared to mice fed low-fat diet (LFD). Oral administration of poorly bioavailable  
24 grape polyphenol extract (GPE) and  $\beta$ -carotene decreased HFD-induced ROS in the gut to levels  
25 comparable to LFD-fed mice, while administration of more bioavailable dietary antioxidants ( $\alpha$ -  
26 lipoic acid, vitamin C, vitamin E) did not. Forty percent of administered GPE antioxidant activity  
27 was measured in feces collected over 24 h, confirming poor bioavailability and persistence in the  
28 gut. The bloom of beneficial anaerobic gut bacteria, such as *Akkermansia muciniphila*, associated  
29 with improved metabolic status in rodents and humans may be directly linked to protective  
30 antioxidant activity of some dietary components. These findings suggest a possible mechanistic  
31 explanation for the beneficial effects of poorly bioavailable polyphenols on metabolic health.

32

33

34

35

36

37

## 38 Introduction

39 Incidence of metabolic syndrome (MetS) and type-2 diabetes (T2D) is rapidly growing in  
40 the world's population [1], highlighting the importance of new approaches for prevention,  
41 detection, and treatment. Clinical and epidemiological studies as well as associated meta-  
42 analyses, suggest that consumption of diets rich in plant polyphenols offer protection against  
43 development of chronic non-communicable diseases (NCDs) such as MetS and T2D [2-5].  
44 Studies have also shown that dietary polyphenols from a variety of fruits (blueberry, apple,  
45 cranberry, grape) can attenuate the symptoms of MetS in mice [6, 7] and most recently, these  
46 improvements have been associated with alterations in the gut microbiota [8-10]. However, the  
47 mechanism by which these fruit polyphenols, particularly large molecular weight oligomeric and  
48 polymeric flavonoids, exert their beneficial health effects remains uncharacterized. The  
49 hypothesis that dietary antioxidants, such as polyphenols, may protect against chronic NCDs  
50 was formulated more than 60 years ago [11]. This hypothesis gave birth to the widespread  
51 popularity of antioxidants found in fruits, vegetables, chocolate, coffee, tea, wine and  
52 contributed to the development of the dietary supplement industry.

53 Notably, antioxidant flavonoids, such as anthocyanins, monomeric flavan-3-ols, and their  
54 oligomers, B-type proanthocyanidins (PACs), which represent the majority of polyphenols in  
55 grapes [12-14] and other red- or blue-colored berries are poorly bioavailable [15-18]. Relatively  
56 low systemic absorption of these compounds, combined with their documented health benefits,  
57 creates a paradox in understanding the mechanism of action of berry polyphenols and leads to  
58 several hypotheses aimed at explaining their health benefits. Colonic microbes can metabolize  
59 berry flavonoids and some of the resulting metabolites have been suggested to be responsible  
60 for the observed health benefits [19, 20]. Studies from several laboratories have shown that  
61 grape, cranberry, and apple polyphenols promote the growth of mucin-degrading gut bacterium  
62 *Akkermansia muciniphila* in association with leaner phenotype, less intestinal and systemic

63 inflammation, improved oral glucose tolerance, and intestinal gene expression consistent with  
64 improved gut barrier and metabolism [8-10]. Oral administration of *A. muciniphila* cultures in  
65 high-fat diet (HFD)-fed mice attenuated gut barrier dysfunction and other symptoms of MetS [21]  
66 while administration of Amuc\_1100\*, an outer membrane protein of *A. muciniphila* that interacts  
67 with TLR2, improved gut barrier and partially reproduced the beneficial effects of the bacterium  
68 in mice [22, 23]. Increased intestinal abundance of *A. muciniphila* has also been correlated with  
69 anti-diabetic and anti-obesity therapies such as metformin treatment [24, 25] and gastric bypass  
70 surgery [26], further supporting its positive impact on metabolic health.

71           While the ability of poorly bioavailable berry polyphenols to scavenge reactive oxygen  
72 species (ROS), has been widely associated with their health benefits, little is known about the  
73 presence and distribution of ROS or molecular oxygen in human gut. A steep oxygen gradient is  
74 assumed to exist between intestinal submucosa adjacent to the mesentery blood vessels to the  
75 center of the lumen, which is almost anoxic [27]. These assumptions are based on the relatively  
76 invasive measurements with polarographic Clark-type electrodes [28, 29] or on less invasive  
77 and sensitive electron paramagnetic resonance (EPR) oximetry [30]. Increased intestinal  
78 permeability, sometimes referred to as leaky gut syndrome, is usually associated with MetS,  
79 obesity, chronic low grade intestinal inflammation, and gut dysbiosis [31, 32]. It is manifested in  
80 a transport of water into the intestinal lumen and leakage of pro-inflammatory microbial  
81 lipopolysaccharide (LPS) into the bloodstream, which can promote low-grade, systemic  
82 inflammation and insulin resistance [33, 34]. Increased intestinal permeability may also be  
83 associated with greater diffusion of oxygen and ROS in the intestine from the mesenteric  
84 vasculature, which, in turn, may affect gut microbiome communities by favoring oxygen-tolerant  
85 bacteria (facultative anaerobes) at the expense of microbes that thrive under anaerobic or  
86 microaerophilic conditions, such as *A. muciniphila*. Inflammation, associated with inflammatory  
87 bowel disease (IBD) and obesity, also leads to the localized and systemic production of ROS

88 [35, 36]. Therefore, pro-inflammatory disorders may lead to further increase in intestinal ROS  
89 and cause depletion of anaerobic bacterial species, which are particularly sensitive to ROS, as  
90 they lack biochemical defenses systems against their toxic effects [37].

91         Optical in vivo imaging using near-infrared fluorescence (NIRF) light generated by  
92 cyanine-based fluorescent dyes permits relatively deep photon penetration into tissue, minimal  
93 auto-fluorescence, less scatter, and high optical contrast [38, 39]. To better understand the  
94 impact of poorly bioavailable, antioxidant dietary polyphenols on ROS in vivo, we developed a  
95 non-invasive *in situ* method using cyanine-based dyes to measure intestinal abundance of ROS.  
96 In biological systems hydrocyanines selectively react with ROS, such as superoxide, via an  
97 amine oxidation mechanism to regenerate fluorescing cyanine dyes, thus allowing imaging of  
98 nanomolar levels of ROS. The resulting near infrared fluorescence (NIRF) is directly related to  
99 ROS content. Both cell-permeable and impermeable variants of hydrocyanines were developed  
100 and used to study surgically created ischemia [40], implant-associated inflammation [41], cancer  
101 development [42], and commensal bacteria-induced ROS production in intestinal epithelial  
102 sections [43, 44]. Cell-impermeable hydrocyanines were used successfully for the in vivo  
103 imaging of retinal oxidative stress in rats [45].

104         To the best of our knowledge, the present study is the first to use cell-impermeable  
105 hydrocyanines, specifically indocyanine green (ICG), to image ROS in the gut of live animals  
106 using non-invasive fluorescent imaging techniques. This manuscript reports on the development  
107 of ICG fluorescence-based ROS imaging methodology for the gut of live animals and the  
108 application of this methodology to study the effects of grape polyphenols and other dietary  
109 antioxidants on gut ROS content in healthy and HFD-fed, metabolically compromised animals.  
110 Our findings indicate that poorly absorbed dietary polyphenols effectively counteract obesity-  
111 associated ROS increase in the gut, and thus may initiate the cascade of events that lead to the  
112 improvement in MetS and associated dysbiosis.

## 113 **Materials and Methods**

114 **Mice.** Animal studies were conducted at an AAALAC-approved facility of Rutgers University  
115 using Rutgers IACUC-approved protocols. Twenty-five C57BL/6J diet-induce obese (DIO; 60  
116 kcal% fat diet; Research Diet #D12492) and twenty-five C57BL/6J control (10 kcal% fat diet;  
117 Research Diets #D12450J) male mice (Jackson Labs, Cat# 380050) were purchased at 13 wk-  
118 old. Both sets of mice were randomly divided into five groups (1 control, 4 experimental groups)  
119 of five mice and maintained on their respective diets. Animals were acclimated for two weeks  
120 before experimentation and housed at a constant temperature on a 12 h light/dark cycle with  
121 free access to food and water.

122 **Phytochemicals and reagents.** Indocyanine green (ICG),  $\beta$ -carotene, gallic acid,  $\alpha$ -lipoic acid,  
123 L-ascorbic acid (vitamin C), D-alpha-tocopherol succinate (vitamin E) and 2,2'-azino-bis (3-  
124 ethylbenzothiazoline-6-sulphonic acid (ABTS), 6-hydroxy-2,5,7,8-tetramethylchroman-2-  
125 carboxylic acid (TROLOX), purified oligomeric B-type proanthocyanidins from grape seed (Cat#  
126 1298219), and procyanidin B2 analytic standard (Cat # 29106-49-8) were purchased from  
127 Sigma-Aldrich, St Louis, MO. Grape polyphenol extract (GPE) was prepared from frozen grape  
128 pomace (provided by Welch's, Concord, MA). Details of grape pomace extraction and column-  
129 purification, GPE biochemical characterization, and colorimetric quantification of total  
130 polyphenols and PAC contained in GPE are described in Supplementary Methods.

131

## 132 **Grape polyphenol extract (GPE)**

133 Frozen grape pomace was added to 50% ethanol in a ratio of 1:5 (grams:milliliters) and  
134 thoroughly ground in a Vitamix® Blender. The pH of the pomace slurry was decreased to 2.5  
135 with concentrated sulfuric acid, and the mixture extracted for 2 h at 80°C with agitation. The  
136 extract was separated from the solids with a filtration centrifuge (Model RA-20VX, Rousselet

137 Robatel Co., Annonay, France). The filtered extract was concentrated to 100 mL in a rotary  
138 evaporator and the polyphenol fraction further purified using solid-phase extraction (SPE) Strata  
139 C-18-E 20 g / 60 mL column (Phenomenex, Torrance, CA). The column was prewashed using 2  
140 bed volumes each of ethyl acetate, followed by methanol acidified with 1% acetic acid, and then  
141 water acidified with 1% acetic acid. After loading the extract (approximately 20 ml) onto the  
142 column, the column was washed with 3 bed volumes of water acidified with 1% acetic acid.  
143 Thereafter, polyphenols were eluted with methanol acidified with 1% acetic acid. The eluate was  
144 collected and rotary-evaporated to dryness. To fully remove GPE from the evaporating flasks,  
145 extract was re-dissolved in water, freeze-dried, and stored -20°C until use.

#### 146 **GPE characterization by LC-MS/MS and colorimetric quantification**

147 Procyanidin B2 was used as an external standard for the quantification of some of the individual  
148 compounds, as procyanidin B2 equivalents exist in GPE and in PACs. We previously verified  
149 that PACs with different degrees of polymerization accounted for 90% of the purified grape seed  
150 PACs purchased from Sigma-Aldrich and used in our experiments and performed a detailed LC-  
151 MS analysis of the sample, using the methodology described in Zhang *et al.* [46]. PACs,  
152 quantified with DMAC assay adapted from Prior *et al.* 2010 [47] and total polyphenols,  
153 quantified with Folin-Ciocalteu assay [48] were found to comprise 56% and 69% of GPE,  
154 respectively.

155         Using this LC-MS method, we were able to quantify PAC monomers, dimers, trimers,  
156 tetramers and pentamers, as well as their corresponding gallates (**Supplementary Fig 1**).  
157 Overall, these compounds comprised 18% GPE. The discrepancy between colorimetric and LC-  
158 MS quantification was attributed to the presence of multiple PAC derivatives not quantified with  
159 the LC-MS method. The colorimetric method, on the other hand, quantifies total PACs and

160 polyphenols in the sample. Qualitatively, the biochemical composition of GPE and the  
161 oligomeric B-type PAC sample from Sigma-Aldrich [46] was found to be similar.

162

163 **Feces extraction for antioxidant and total polyphenol assays.** Fifteen wk-old mice were  
164 gavaged with GPE delivering 32 mg total polyphenol / kg of body weight. Feces were collected  
165 hourly from 1 h to 12 h and at 24 h after the gavage. Feces were mixed with 50% Ethanol (100  
166 mg/1 mL), then homogenized with a Geno/Grinder (Model 2010, Metuchen, NJ) at 1500 rpm for  
167 8 min or ultra-sonicated for 30 min. Samples were centrifuged at 13,000 rcf for 40 min. The  
168 supernatant was collected and used for 2,2'-azino-bis(3-ethylbenzothiazoline-6-sulphonic  
169 acid (ABTS) antioxidant assay [49] and Folin–Ciocalteu assay to quantify total polyphenols. For  
170 the ABTS assay, 7 mg/mL ABTS solution and 50 mg/mL  $K_2S_2O_8$  solution were prepared in 1 mL  
171 of milliQ water. 20  $\mu$ L 50 mg/mL  $K_2S_2O_8$  were added to the ABTS solution before the mixture  
172 was incubated for 30 min and then diluted to 20 mL of MilliQ water. TROLOX standards were  
173 prepared in 95% ethanol from 600  $\mu$ g/mL stock and diluted to a standard range. For the assay,  
174 1 mL of ABTS was added to 50  $\mu$ L of samples or standard, briefly vortexed, then loaded to a  
175 microwell plate in duplicate. Absorbance at 734 nm was read within 4 min using a BioTek  
176 Synergy HT Multi-Detection Plate Reader.

177 **Preparation of hydro-indocyanine green (H-ICG).** H-ICG used for the studies was prepared  
178 from the cyanine dye, indocyanine green, by reduction with  $NaBH_4$ . Indocyanine green and its  
179 hydrocyanine product H-ICG are generally membrane impermeable, nontoxic and should  
180 remain in the gastrointestinal track until eliminated via feces. Briefly, 8 mg of dye was dissolved  
181 in 8 mL methanol and reduced by adding 4-8 mg of  $NaBH_4$ . The reaction mixture was stirred for  
182 5-10 minutes and solvent removed under reduced pressure. The resulting precipitate was  
183 nitrogen capped and stored at  $-20^\circ C$ .

184



185 **In vivo ROS imaging and analyses.** Prior to imaging, body hair around the abdomen and  
186 back were shaved and depilated using Veet® hair remover followed by a water rinse. At 16  
187 weeks of age, animals were gavaged with vehicle or GPE (total polyphenol dose of 32 mg/kg),  
188 PAC (32 mg/kg),  $\beta$ -carotene (32 mg/kg), or a mixture of L-ascorbic acid, D- $\alpha$ -tocopherol  
189 succinate, and  $\alpha$ -lipoic acid (each 32 mg/kg). Mixing H-ICG with GPE reduced the sensitivity of  
190 the measurements, so H-ICG was reconstituted in water (1 mg/mL) and orally administered  
191 (dose of 6 mg/kg) 1 h after administration of the antioxidants, which resulted in the most reliable  
192 and reproducible fluorescent images (data not shown). In-Vivo MS FX PRO imaging system  
193 (Bruker, Ettlingen, German), equipped with Bruker Carestream Multimodal Animal Rotation  
194 System (MARS), was used to capture both brightfield and NIRF images of the experimental  
195 animals at precise and reproducible positioning angles. Mice were anesthetized with 2%  
196 isoflurane and placed in the imaging system 45 min after dye administration (1 h 45 min after  
197 polyphenol/antioxidant treatment). Isoflurane anesthesia (1-2%) was maintained during imaging  
198 procedure. A small bead of sterile artificial tears ointment was applied to each eye of mice to  
199 maintain lubrication.

200 Mice were initially placed into the MARS system in a supine position with their spine  
201 directed towards the camera. Each mouse was rotated at 30° increments over 360° for 24 min  
202 and fluorescence and brightfield images were taken consecutively at each angle. Rotation of  
203 each mouse started 45 min following dye administration so that imaging of ventral orientation  
204 corresponded with strongest signal, approximately 1 h after dye administration. Following  
205 excitation illumination at 760 nm, emission at 830 nm was recorded using a filter equipped high  
206 sensitivity cooled charged coupled device camera. Acquisition time was 20 s for each  
207 fluorescent image, followed by a brightfield light photograph (0.5 s exposure). Both NIRF and  
208 brightfield images were optically superimposed to visualize anatomical information.

209 Quantitative analysis of the optical signal capture was completed in Carestream MI  
210 software v5/0.529 (Carestream Health Inc.). Fluorescence intensity within a rectangular area of

211 fixed dimensions (161 by 158 pixels) was recorded. Images from control mice (i.e. not gavaged)  
212 were used to subtract background and the mean fluorescence intensity for each image was  
213 determined. Fluorescence images were converted to photons/s/mm<sup>2</sup> using Bruker imaging  
214 software. Data were presented with the fluorescence values as a function of the imaging angles.

215

216 **Statistical analysis.** Statistical analyses were conducted using GraphPad Prism 5. Details are  
217 provided in figure legends.

218

## 219 RESULTS

### 220 Excretion of grape polyphenols and related antioxidant activity.

221 Fecal samples from mice gavaged with GPE (32 mg total polyphenols/kg) showed a large  
222 increase in antioxidant activity (**Fig. 1**). This increase was apparent at 4 h in mice allowed *ad*  
223 *libitum* access to food after treatment (**Fig. 1A**) and at 3 h in mice fasted for 12 h after treatment  
224 (**Fig. 1B**). Fecal antioxidant activity in fed animals returned to basal levels 12 h after treatment,  
225 while elevated fecal antioxidant capacity could still be detected at 12 h in fasted mice, after  
226 which time *ad libitum* feeding was resumed. Fecal antioxidant activity of these initially fasted  
227 mice returned to basal levels by 24 h.

228 **Figure 1. Fecal samples collected after GPE treatment contain high levels of antioxidant**  
229 **activity.** Antioxidant activity (Trolox equivalents) in murine fecal samples (n= 6 mice) collected  
230 before (0 h) a single oral dose of GPE (32 mg total polyphenols/ kg) and **A.** every hour for 12 h  
231 after treatment while mice had *ad libitum* access to chow diet or **B.** every hour during a 12 h  
232 period of food restriction, after which chow diet was replaced and an additional fecal sample  
233 was collected at 24 h. **C.** Total polyphenols (as gallic acid equivalents, left) and total antioxidant

234 capacity (as Trolox equivalents, right) in fecal samples collected before gavage (0 h, black bars)  
235 and in total feces collected over the 24 h period following oral GPE administration (crosshatched  
236 bars), as compared to the initial dose (white bars). N=6 mice; Data are reported as mean  $\pm$  SD.

237

238 In a separate experiment, fecal samples were collected from mice before gavage (0 h)  
239 and total feces were collected over the 24 h period after gavage with GPE (66 mg GPE  
240 equivalent to 32 mg total polyphenols/ kg body weight). Fecal samples were pooled over a 24 h  
241 period and analyzed for antioxidant capacity (as Trolox equivalents) and total polyphenol  
242 content (as gallic acid equivalents; **Fig. 1C**). Based on the reactivity in Folin–Ciocalteu and  
243 ABTS assays, these data suggest that approximately 40% of the initially gavaged GPE  
244 antioxidant activity could be recovered in the feces.

#### 245 **Imaging of reactive oxygen species (ROS) in mouse gut: timing and intensity.**

246 Mice fed both diets for 15 weeks were gavaged with GPE followed by H-ICG,  
247 anesthetized and imaged for NIRF at 830 nm (excitation 760 nm) in a ventral orientation  
248 (abdomen facing camera) 1, 2 and 3 h following H-IGG administration (2, 3 and 4 h following  
249 GPE administration). These experiments were designed to determine the timing of maximum  
250 ROS-induced fluorescence response following the administration of GPE and H-ICG and to  
251 compare levels of ROS in the guts of LFD-fed and HFD-fed mice. A significant and reproducible  
252 increase in ROS content was observed in HFD-fed mice compared to LFD-fed mice (**Fig. 2A**) at  
253 1 h and 2 h measurements (**Fig. 2B**). The greatest ROS signal was observed 1 h after H-ICG  
254 administration (2 h after GPE administration) and decreased by 3 h following H-IGG  
255 administration (**Fig. 2B**). Based on these data, all subsequent in vivo ROS measurements were  
256 carried out as close as possible to 1 h following H-ICG administration (2 h following GPE  
257 administration).

258 **Figure 2. HFD-fed obese mice have higher levels of intestinal ROS than LFD-fed lean**  
259 **mice.** Mice fed HFD or LFD for 10 weeks (n = 6/ group) were imaged in stationary, ventral  
260 orientation (abdomen facing camera) 3 h after H-ICG administration (i.e. 4 h after GPE  
261 administration). **A.** Representative overlay of ROS-associated NIRF image and corresponding  
262 brightfield image of a HFD-fed obese mouse (left) and a LFD-fed lean mouse (right). NIRF  
263 intensity scale shown on the right, image was normalized accordingly using Carestream MI  
264 software. **B.** ROS-associated NIRF in healthy, lean mice (white bars) and in obese mice (black  
265 bars) at 1, 2, and 3 h after administration of H-ICG. N=6 mice per group; Data are reported as  
266 mean  $\pm$  SD. One-way ANOVA followed by the Tukey's multiple comparison test was performed  
267 across both groups and all time points. Same letters indicate no difference between groups or  
268 time points while different letters indicate significant difference ( $p < 0.05$ ).

269

## 270 **Comparison of ROS content in HFD (obese) and LFD (normal) mice over 360° of rotation.**

271 For all subsequent experiments, the MARS rotational system was used to capture both  
272 brightfield and NIRF images of individual mice at precise and repeatable angles to maximize the  
273 detection of NIRF emitted by ROS-sensitive dye. Total recorded NIRF was integrated over the  
274 full 360° turn with NIRF images superimposed on the brightfield images taken at every 30° turn  
275 (**Fig. 3A**). Compared to LFD-fed mice, the intestinal tract of HFD-fed animals contained  
276 significantly higher levels of ROS (**Fig. 3**). Plots of NIRF intensity at every 30° turn (**Fig. 3B**) and  
277 calculation of total area under the NIRF curve (**Fig. 3C**) further confirmed the presence of  
278 significantly greater quantities of ROS, detected by H-ICG fluorescence, in the intestines of the  
279 HFD-fed, obese and hyperglycemic mice. Specifically, compared to LFD-fed mice, HFD-fed  
280 mice had 4.1-times greater ROS-associated NIRF using rotational imaging ( $1.1 \times 10^8$  vs.  $2.7 \times$   
281  $10^7$  [photons\*deg]/s/mm<sup>2</sup> AUC; Mann Whitney test,  $p < 0.0001$ ) and 3.8-times greater ROS-  
282 associated NIRF using a single recording in ventral orientation ( $6.9 \times 10^5$  vs.  $1.8 \times 10^5$

283 photons/s/mm<sup>2</sup>; Mann Whitney test,  $p < 0.0001$ ; **Fig. 3C**), which is denoted as 0° in Figure 3A.  
284 As expected for light emanating from the intestines, ventral orientation towards the camera  
285 produced the highest NIRF. It is possible that our measurements underestimate the differences  
286 between obese and lean animals as the NIRF emitted from obese mice had to pass through a  
287 thicker layer of adipose tissue.

288 **Figure 3. ROS-associated NIRF measured over a 360° rotational scan is higher in obese**  
289 **mice than in lean mice. A.** ROS-associated NIRF images in obese (HFD) and lean (LFD) mice  
290 superimposed onto brightfield images. Rotation started 45 min following H-ICG administration,  
291 which was 1 h 45 min after GPE administration. Images were taken at 30° rotational increments  
292 over a course of a 360° rotation completed in 24 min. Images were colorized using Carestream  
293 MI software according to the NIRF intensity scale shown on right. **B.** Intensity of NIRF  
294 measured at different orientational angles in HFD and LFD-fed mice. Zero angle represents  
295 ventral orientation (abdomen facing camera). **C.** Area under curve (AUC) calculated from panel  
296 B (left axis) and NIRF measured at 0° corresponding to the ventral orientation (right axis). N= 20  
297 mice per group; Data are reported as mean  $\pm$  SD. Significant difference between HFD and LFD  
298 groups was detected using unpaired Mann Whitney test, \*\*\*  $p < 0.0001$ .  
299

300 **Grape polyphenols reduce detectable ROS in the intestines of HFD and LFD-fed mice.**

301 We compared the ability of GPE, its major antioxidant constituents – PAC [46], and other  
302 dietary antioxidants, such as  $\beta$ -carotene, and a mixture of vitamins C, E and  $\alpha$ -lipoic acid (ATL  
303 mixture), to reduce ROS in the mouse intestine. GPE, PAC and  $\beta$ -carotene represent relatively  
304 poorly bioavailable dietary antioxidants, while vitamins C, E and  $\alpha$ -lipoic acid are all relatively  
305 bioavailable and relatively less stable in the digestive tract. Compared to obese, HFD-fed mice  
306 treated with vehicle (water), animals gavaged with GPE, PAC, or  $\beta$ -carotene had significantly

307 reduced ROS in their intestines: 2.7-fold less for GPE and 1.9-fold less for both PAC and  $\beta$ -  
308 carotene (**Fig. 4A-B**). In contrast, the ATL mixture did not change the ROS-induced  
309 fluorescence (**Fig. 4A-B**).

310 **Figure 4. ROS-associated rotational NIRF of obese, HFD-fed mice treated with dietary**  
311 **antioxidants. A.** ROS-associated 360° rotational NIRF images of obese HFD-fed mice  
312 superimposed on brightfield images. Animals were gavaged (1 h 45 min before imaging) with  
313 GPE, B-type proanthocyanidins (PAC),  $\beta$ -carotene ( $\beta$ -car), or ATL (mixture of L-ascorbic acid,  
314 D- $\alpha$ -tocopherol succinate and  $\alpha$ -lipoic acid) at 32 mg/kg dose, except for GPE, which was dosed  
315 to deliver 32 mg/kg dose of total polyphenols. Images were taken at 30° rotational increments  
316 over a course of a 360° rotation completed in 24 min. Images were colorized using Carestream  
317 MI software according to the NIRF intensity scale shown on right. **B.** Area under curve (AUC)  
318 calculated from 4A as a function of different antioxidant treatments. Numbers under x-axis are  
319  $\times 10^7$  (photons\*deg)/s/mm<sup>2</sup> AUC for the corresponding group. N= 5 mice per group. Data are  
320 reported as mean  $\pm$  SD. Significant difference between groups was detected by one-way  
321 ANOVA ( $p= 0.002$ ) followed by *post hoc* comparison to water-treated group using Dunnett's  
322 test, \*  $p < 0.05$ , \*\*  $p < 0.01$ .

323

324 Similar results were obtained in LFD-fed, lean mice subjected to the same treatments,  
325 although the LFD-fed mice consistently exhibited lower basal levels of ROS (**Fig. 5**).  
326 Specifically, ROS-associated NIRF was reduced 2.3 times by GPE treatment, 2.4 times by  
327 PACs, 2.8 by  $\beta$ -carotene, and 1.9 times for ATL, although the latter was not significantly  
328 different from the control or other three treatments at  $p \leq 0.05$ .

329 **Figure 5. ROS-associated rotational NIRF of lean, LFD-fed mice treated with dietary**  
330 **antioxidants. A.** ROS-associated 360° rotational NIRF images of obese LFD-fed mice

331 superimposed on brightfield images. Animals were gavaged (1 h 45 min before imaging) with  
332 GPE, B-type proanthocyanidins (PAC),  $\beta$ -carotene ( $\beta$ -car), or ATL (mixture of L-ascorbic acid,  
333 D- $\alpha$ -tocopherol succinate and  $\alpha$ -lipoic acid) at 32 mg/kg dose, except for GPE which was dosed  
334 to deliver 32 mg/kg dose of total polyphenols. Images were taken at 30° rotational increments  
335 over a course of a 360° rotation completed in 24 min. Images were colorized using Carestream  
336 MI software according to the NIRF intensity scale shown on right. **B.** Area under curve (AUC)  
337 calculated from 5A as a function of different antioxidant treatments. Numbers under x-axis are  
338  $\times 10^7$  (photons\*deg)/s/mm<sup>2</sup> AUC for the corresponding group. N=5 mice per group; Data are  
339 reported as mean  $\pm$  SD. Significant difference between groups was detected by one-way  
340 ANOVA ( $p= 0.023$ ) followed by *post hoc* comparison to water-treated group using Dunnett's  
341 test, \*  $p < 0.05$ .

342

## 343 **DISCUSSION**

344 Our data demonstrate that hyperglycemia and obesity in HFD-fed mice is associated  
345 with the higher content of ROS in the gut. This increased ROS content can be at least partially  
346 explained by the leaky gut syndrome usually associated with MetS and T2D [31, 50]. Increased  
347 permeability of the intestinal wall should allow more oxygen from mesenteric vasculature to  
348 diffuse into the lumen. Our data, for the first time, confirmed and visualized this phenomenon, as  
349 the increase in ROS in the gut of obese mice is likely associated with higher oxygen tension  
350 (**Fig. 2**). The data also showed that oral administration of poorly bioavailable dietary  
351 antioxidants such as GPE, its main component PAC, and  $\beta$ -carotene can reduce the content of  
352 ROS in the intestines of both obese and lean mice. In the case of obese mice, antioxidants,  
353 particularly grape polyphenols, reduced ROS content to the levels observed in the lean mice.  
354 This observation sheds light on the mechanism of action of dietary antioxidants to improve

355 carbohydrate metabolism and prevent the development of T2D and obesity documented in  
356 multiple animal and human studies (see introduction). It may also provide some clues about the  
357 reason for earlier reported beneficial changes in gut microbiome and intestinal permeability  
358 associated with administration of poorly bioavailable dietary polyphenols [8-10].

359         It is tempting to speculate that very significant changes in gut redox potential associated  
360 with increased oxygen tension and ROS content in the gut will change the gut ecosystem,  
361 favoring allegedly beneficial anaerobic species, such as *A. muciniphila*, whose presence  
362 positively correlates with the improvements in symptoms of MetS and T2D [21-23, 51]. ROS are  
363 the most reactive and toxic forms of oxygen, particularly for anaerobic or microaerophilic  
364 organisms, such as *A. muciniphila*, which have no antioxidant systems to protect them [37].  
365 Dietary polyphenols may, at least partially, act to reduce ROS and restore a more favorable  
366 redox potential in the gut thus promoting a healthier gut microbial environment. However, it is  
367 also possible that poorly bioavailable berry polyphenols exert their beneficial effects on health  
368 and microbiome through their antibiotic effects [52], by being partially metabolized by colonic  
369 bacteria to pharmacologically active compounds [20, 53], or by directly affecting growth of some  
370 gut bacteria as nutrients or regulators. However, our data suggest that close to 50% of the  
371 higher molecular weight polyphenols from GPE, which comprises mostly PAC, pass through the  
372 digestive system and can be recovered in the feces along with antioxidant activity they confer  
373 (**Fig. 1**). This observation downplays the possibility of GPE action through colonic metabolites or  
374 as nutritional substrates.

375         A mixture of more bioavailable dietary antioxidants comprising vitamins C, E, and  $\alpha$ -  
376 lipoic acid was less effective in reducing intestinal ROS, particularly in the HFD-fed mice. We  
377 attribute this lack of activity to the fact that these essential nutrients are quickly absorbed or  
378 degraded during the intestinal transit, and thus cannot significantly affect ROS content and  
379 redox potential in the lower parts of the intestine.



380 Data presented in this manuscript may be one of the first demonstrations of how the  
381 antioxidant properties of dietary components are mechanistically linked to the prevention or  
382 mitigation of T2D and obesity and how these conditions are linked to the accumulation of ROS  
383 and to gut microbial ecology. We observed that dietary antioxidants, such as polyphenols in  
384 GPE, effectively mitigated HFD-induced accumulation of ROS in the gut and in the feces.  
385 Earlier, we have shown that GPE reduced endotoxemia, inflammatory cytokines, hyperglycemia  
386 and adiposity in HFD-fed mice while promoting a marked bloom of *A. muciniphila* in the gut [8].

387 In conclusion, this manuscript may begin to explain the mechanisms behind the health  
388 benefits of grapes and other fruits rich in poorly bioavailable antioxidants. The presented data  
389 suggest that beneficial effects of poorly bioavailable grape polyphenols (mostly PACs) on  
390 MetS/T2D, obesity, and hyperglycemia may be mediated through changes in gut microbiome  
391 triggered by their ROS scavenging activity. Specifically, reduction in ROS may benefit anaerobic  
392 and microaerophilic gut bacteria, such as *A. muciniphila*, that reside near the intestinal  
393 epithelium through which oxygen and ROS leak into the lumen. Well-documented bloom of *A.*  
394 *muciniphila*, which has been associated with anti-diabetic effects and production of anti-diabetic  
395 peptides such as Amuc\_1100\* [8, 9, 21-23], may be one of the events responsible for the  
396 reduction of hyperglycemia, reduced fat accumulation and improvements in molecular markers  
397 for intestinal health associated with dietary administration of GPE. Therefore, reducing the  
398 intestinal ROS associated with dysbiosis and MetS may be a promising target for developing  
399 new pharmaceutical or dietary therapies. Nevertheless, we cannot exclude the possibility that  
400 GPE-induced improvements in MetS are mediated by parallel, still undiscovered mechanism(s)  
401 that are independent of the antioxidant effects of GPE.

402 **Acknowledgments.** IR is the guarantor for this manuscript. The authors thank Derek Adler for  
403 technical assistance with NIRF imaging and Kristin Moskal for help with preparing GPE.

404 **Funding.** This work was supported by R01-AT-008618-01 from the National Center for  
405 Complementary and Integrative Health (NCCIH) and the Office of Dietary Supplements (ODS);  
406 DMR is funded by P50-AT-002776-01 from NCCIH / ODS; DER is funded by K01-AT008829  
407 from NCCIH / ODS.

408

409

410 **References**

- 411 [1] Guariguata L, Whiting DR, Linnenkamp U, Beagley J, Shaw J. Global Estimates of the  
412 Prevalence of Impaired Glucose Tolerance for 2013 and Projections to 2035. *Diabetes*.  
413 2014;63:A391-A.
- 414 [2] Bertola ML, Rimm EB, Mukamal KJ, Hu FB, Willett WC, Cassidy A. Dietary flavonoid intake  
415 and weight maintenance: three prospective cohorts of 124,086 US men and women followed for  
416 up to 24 years. *BMJ*. 2016;352:i17.
- 417 [3] Stull AJ, Cash KC, Johnson WD, Champagne CM, Cefalu WT. Bioactives in blueberries  
418 improve insulin sensitivity in obese, insulin-resistant men and women. *J Nutr*. 2010;140:1764-8.
- 419 [4] Wang X, Ouyang Y, Liu J, Zhu M, Zhao G, Bao W, et al. Fruit and vegetable consumption  
420 and mortality from all causes, cardiovascular disease, and cancer: systematic review and dose-  
421 response meta-analysis of prospective cohort studies. *BMJ*. 2014;349:g4490.
- 422 [5] Tresserra-Rimbau A, Guasch-Ferre M, Salas-Salvado J, Toledo E, Corella D, Castaner O, et  
423 al. Intake of Total Polyphenols and Some Classes of Polyphenols Is Inversely Associated with  
424 Diabetes in Elderly People at High Cardiovascular Disease Risk. *J Nutr*. 2016.
- 425 [6] Takikawa M, Inoue S, Horio F, Tsuda T. Dietary anthocyanin-rich bilberry extract ameliorates  
426 hyperglycemia and insulin sensitivity via activation of AMP-activated protein kinase in diabetic  
427 mice. *J Nutr*. 2010;140:527-33.
- 428 [7] Roopchand DE, Kuhn P, Rojo LE, Lila MA, Raskin I. Blueberry polyphenol-enriched soybean  
429 flour reduces hyperglycemia, body weight gain and serum cholesterol in mice. *Pharmacol Res*.  
430 2013;68:59-67.
- 431 [8] Roopchand DE, Carmody RN, Kuhn P, Moskal K, Rojas-Silva P, Turnbaugh PJ, et al.  
432 Dietary Polyphenols Promote Growth of the Gut Bacterium *Akkermansia muciniphila* and  
433 Attenuate High-Fat Diet-Induced Metabolic Syndrome. *Diabetes*. 2015;64:2847-58.

- 434 [9] Anhe FF, Roy D, Pilon G, Dudonne S, Matamoros S, Varin TV, et al. A polyphenol-rich  
435 cranberry extract protects from diet-induced obesity, insulin resistance and intestinal  
436 inflammation in association with increased *Akkermansia* spp. population in the gut microbiota of  
437 mice. *Gut*. 2014.
- 438 [10] Masumoto S, Terao A, Yamamoto Y, Mukai T, Miura T, Shoji T. Non-absorbable apple  
439 procyanidins prevent obesity associated with gut microbial and metabolomic changes. *Sci Rep*.  
440 2016;6:31208.
- 441 [11] Harman D. Aging: a theory based on free radical and radiation chemistry. *J Gerontol*.  
442 1956;11:298-300.
- 443 [12] Xu Y, Simon JE, Welch C, Wightman JD, Ferruzzi MG, Ho L, et al. Survey of polyphenol  
444 constituents in grapes and grape-derived products. *J Agric Food Chem*. 2011;59:10586-93.
- 445 [13] Liang Z, Yang Y, Cheng L, Zhong GY. Characterization of polyphenolic metabolites in the  
446 seeds of *Vitis* germplasm. *J Agric Food Chem*. 2012;60:1291-9.
- 447 [14] Roopchand DE, Kuhn P, Poulev A, Oren A, Lila MA, Fridlender B, et al. Biochemical  
448 analysis and in vivo hypoglycemic activity of a grape polyphenol-soybean flour complex. *J Agric*  
449 *Food Chem*. 2012;60:8860-5.
- 450 [15] Abia R, Fry SC. Degradation and metabolism of <sup>14</sup>C-labelled proanthocyanidins from carob  
451 (*Ceratonia siliqua*) pods in the gastrointestinal tract of the rat. *J Sci Food Agric*. 2001;81:1156 -  
452 65.
- 453 [16] Felgines C, Krisa S, Mauray A, Besson C, Lamaison JL, Scalbert A, et al. Radiolabelled  
454 cyanidin 3-O-glucoside is poorly absorbed in the mouse. *Br J Nutr*. 2010;103:1738-45.
- 455 [17] Czank C, Cassidy A, Zhang Q, Morrison DJ, Preston T, Kroon PA, et al. Human  
456 metabolism and elimination of the anthocyanin, cyanidin-3-glucoside: a (13)C-tracer study. *Am J*  
457 *Clin Nutr*. 2013;97:995-1003.

- 458 [18] Choy YY, Jiggers GK, Oteiza PI, Waterhouse AL. Bioavailability of intact  
459 proanthocyanidins in the rat colon after ingestion of grape seed extract. *J Agric Food Chem.*  
460 2013;61:121-7.
- 461 [19] Selma MV, Espin JC, Tomas-Barberan FA. Interaction between phenolics and gut  
462 microbiota: role in human health. *J Agric Food Chem.* 2009;57:6485-501.
- 463 [20] González-Sarrías A, Espín JC, Tomás-Barberán FA. Non-extractable polyphenols produce  
464 gut microbiota metabolites that persist in circulation and show anti-inflammatory and free  
465 radical-scavenging effects. *Trends Food Sci Tech.* 2017;69:281-8.
- 466 [21] Everard A, Belzer C, Geurts L, Ouwerkerk JP, Druart C, Bindels LB, et al. Cross-talk  
467 between *Akkermansia muciniphila* and intestinal epithelium controls diet-induced obesity. *Proc*  
468 *Natl Acad Sci U S A.* 2013;110:9066-71.
- 469 [22] Plovier H, Everard A, Druart C, Depommier C, Van Hul M, Geurts L, et al. A purified  
470 membrane protein from *Akkermansia muciniphila* or the pasteurized bacterium improves  
471 metabolism in obese and diabetic mice. *Nat Med.* 2017;23:107-13.
- 472 [23] Ottman N, Huuskonen L, Reunanen J, Boeren S, Klievink J, Smidt H, et al. Characterization  
473 of Outer Membrane Proteome of *Akkermansia muciniphila* Reveals Sets of Novel Proteins  
474 Exposed to the Human Intestine. *Front Microbiol.* 2016;7:1157.
- 475 [24] Shin NR, Lee JC, Lee HY, Kim MS, Whon TW, Lee MS, et al. An increase in the  
476 *Akkermansia* spp. population induced by metformin treatment improves glucose homeostasis in  
477 diet-induced obese mice. *Gut.* 2014;63:727-35.
- 478 [25] Forslund K, Hildebrand F, Nielsen T, Falony G, Le Chatelier E, Sunagawa S, et al.  
479 Disentangling type 2 diabetes and metformin treatment signatures in the human gut microbiota.  
480 *Nature.* 2015;528:262-6.
- 481 [26] Liou AP, Paziuk M, Luevano JM, Jr., Machineni S, Turnbaugh PJ, Kaplan LM. Conserved  
482 shifts in the gut microbiota due to gastric bypass reduce host weight and adiposity. *Sci Transl*  
483 *Med.* 2013;5:178ra41.

- 484 [27] Espey MG. Role of oxygen gradients in shaping redox relationships between the human  
485 intestine and its microbiota. *Free Radic Biol Med.* 2013;55:130-40.
- 486 [28] Dawson AM, Trenchard D, Guz A. Small bowel tonometry: assessment of small gut  
487 mucosal oxygen tension in dog and man. *Nature.* 1965;206:943-4.
- 488 [29] Hauser CJ, Locke RR, Kao HW, Patterson J, Zipser RD. Visceral surface oxygen tension in  
489 experimental colitis in the rabbit. *J Lab Clin Med.* 1988;112:68-71.
- 490 [30] He G, Shankar RA, Chzhan M, Samouilov A, Kuppusamy P, Zweier JL. Noninvasive  
491 measurement of anatomic structure and intraluminal oxygenation in the gastrointestinal tract of  
492 living mice with spatial and spectral EPR imaging. *Proc Natl Acad Sci U S A.* 1999;96:4586-91.
- 493 [31] de Kort S, Keszthelyi D, Masclee AA. Leaky gut and diabetes mellitus: what is the link?  
494 *Obes Rev.* 2011;12:449-58.
- 495 [32] Teixeira TF, Collado MC, Ferreira CL, Bressan J, Peluzio Mdo C. Potential mechanisms for  
496 the emerging link between obesity and increased intestinal permeability. *Nutr Res.* 2012;32:637-  
497 47.
- 498 [33] Cani PD, Amar J, Iglesias MA, Poggi M, Knauf C, Bastelica D, et al. Metabolic endotoxemia  
499 initiates obesity and insulin resistance. *Diabetes.* 2007;56:1761-72.
- 500 [34] Geurts L, Neyrinck AM, Delzenne NM, Knauf C, Cani PD. Gut microbiota controls adipose  
501 tissue expansion, gut barrier and glucose metabolism: novel insights into molecular targets and  
502 interventions using prebiotics. *Benef Microbes.* 2014;5:3-17.
- 503 [35] Keshavarzian A, Sedghi S, Kanofsky J, List T, Robinson C, Ibrahim C, et al. Excessive  
504 production of reactive oxygen metabolites by inflamed colon: analysis by chemiluminescence  
505 probe. *Gastroenterology.* 1992;103:177-85.
- 506 [36] Fernandez-Sanchez A, Madrigal-Santillan E, Bautista M, Esquivel-Soto J, Morales-  
507 Gonzalez A, Esquivel-Chirino C, et al. Inflammation, oxidative stress, and obesity. *Int J Mol Sci.*  
508 2011;12:3117-32.

- 509 [37] Imlay JA. The molecular mechanisms and physiological consequences of oxidative stress:  
510 lessons from a model bacterium. *Nat Rev Microbiol.* 2013;11:443-54.
- 511 [38] Kundu K, Knight SF, Taylor WR, Murthy N. Hydrocyanines is a new class of small molecule  
512 fluorescent sensors for imaging reactive oxygen species in cell culture, tissue, and in vivo. *Abstr*  
513 *Pap Am Chem S.* 2009;238:1.
- 514 [39] Sadlowski CM, Maity S, Kundu K, Murthy N. Hydrocyanines: a versatile family of probes for  
515 imaging radical oxidants in vitro and in vivo. *Mol Syst Des Eng.* 2017;2:191-200.
- 516 [40] Magalotti S, Gustafson TP, Cao Q, Abendschein DR, Pierce RA, Berezin MY, et al.  
517 Evaluation of Inflammatory Response to Acute Ischemia Using Near-Infrared Fluorescent  
518 Reactive Oxygen Sensors. *Molecular Imaging and Biology.* 2013;15:423-30.
- 519 [41] Selvam S, Kundu K, Templeman KL, Murthy N, Garcia AJ. Minimally invasive, longitudinal  
520 monitoring of biomaterial-associated inflammation by fluorescence imaging. *Biomaterials.*  
521 2011;32:7785-92.
- 522 [42] Burton LJ, Barnett P, Smith B, Arnold RS, Hudson T, Kundu K, et al. Muscadine grape skin  
523 extract reverts snail-mediated epithelial mesenchymal transition via superoxide species in  
524 human prostate cancer cells. *BMC Complement Altern Med.* 2014;14:97.
- 525 [43] Wentworth CC, Alam A, Jones RM, Nusrat A, Neish AS. Enteric commensal bacteria  
526 induce extracellular signal-regulated kinase pathway signaling via formyl peptide receptor-  
527 dependent redox modulation of dual specific phosphatase 3. *J Biol Chem.* 2011;286:38448-55.
- 528 [44] Swanson PA, 2nd, Kumar A, Samarin S, Vijay-Kumar M, Kundu K, Murthy N, et al. Enteric  
529 commensal bacteria potentiate epithelial restitution via reactive oxygen species-mediated  
530 inactivation of focal adhesion kinase phosphatases. *Proc Natl Acad Sci U S A.* 2011;108:8803-  
531 8.
- 532 [45] Prunty MC, Aung MH, Hanif AM, Allen RS, Chrenek MA, Boatright JH, et al. In Vivo  
533 Imaging of Retinal Oxidative Stress Using a Reactive Oxygen Species-Activated Fluorescent  
534 Probe. *Invest Ophthalmol Vis Sci.* 2015;56:5862-70.

535 [46] Zhang L, Carmody RN, Kalariya HM, Duran RM, Moskal K, Poulev A, et al. Grape  
536 proanthocyanidin-induced intestinal bloom of *Akkermansia muciniphila* is dependent on its  
537 baseline abundance and precedes activation of host genes related to metabolic health. *J Nutr*  
538 *Biochem.* 2018;accepted for publication.

539 [47] Prior RL, Fan E, Ji H, Howell A, Nio C, Payne MJ, et al. Multi-laboratory validation of a  
540 standard method for quantifying proanthocyanidins in cranberry powders. *J Sci Food Agric.*  
541 2010;90:1473-8.

542 [48] Singleton VL, Rossi JA. Colorimetry of total phenolics with phosphomolybdic-  
543 phosphotungstic acid reagents. *Am J Enol Vitic.* 1965;16:144-58.

544 [49] Re R, Pellegrini N, Proteggente A, Pannala A, Yang M, Rice-Evans C. Antioxidant activity  
545 applying an improved ABTS radical cation decolorization assay. *Free Radic Biol Med.*  
546 1999;26:1231-7.

547 [50] Mu Q, Kirby J, Reilly CM, Luo XM. Leaky Gut As a Danger Signal for Autoimmune  
548 Diseases. *Front Immunol.* 2017;8:598.

549 [51] Dao MC, Everard A, Aron-Wisnewsky J, Sokolovska N, Prifti E, Verger EO, et al.  
550 *Akkermansia muciniphila* and improved metabolic health during a dietary intervention in obesity:  
551 relationship with gut microbiome richness and ecology. *Gut.* 2016;65:426-36.

552 [52] Daglia M. Polyphenols as antimicrobial agents. *Curr Opin Biotechnol.* 2012;23:174-81.

553 [53] Selma MV, Espin JC, Tomas-Barberan FA. Interaction between Phenolics and Gut  
554 Microbiota: Role in Human Health. *J Agr Food Chem.* 2009;57:6485-501.

555

556



557 **Figure legend to Supplementary Figure 1.**

558  
559 **Supplementary Figure 1.** (+)ESI MS single ion chromatograms extracted at the corresponding  
560 m/z of individual proanthocyanidins (PACs) in GPE sample. **A** – oligomeric PACs; **B** –  
561 oligomeric PAC monogallates.

562

563

564

565

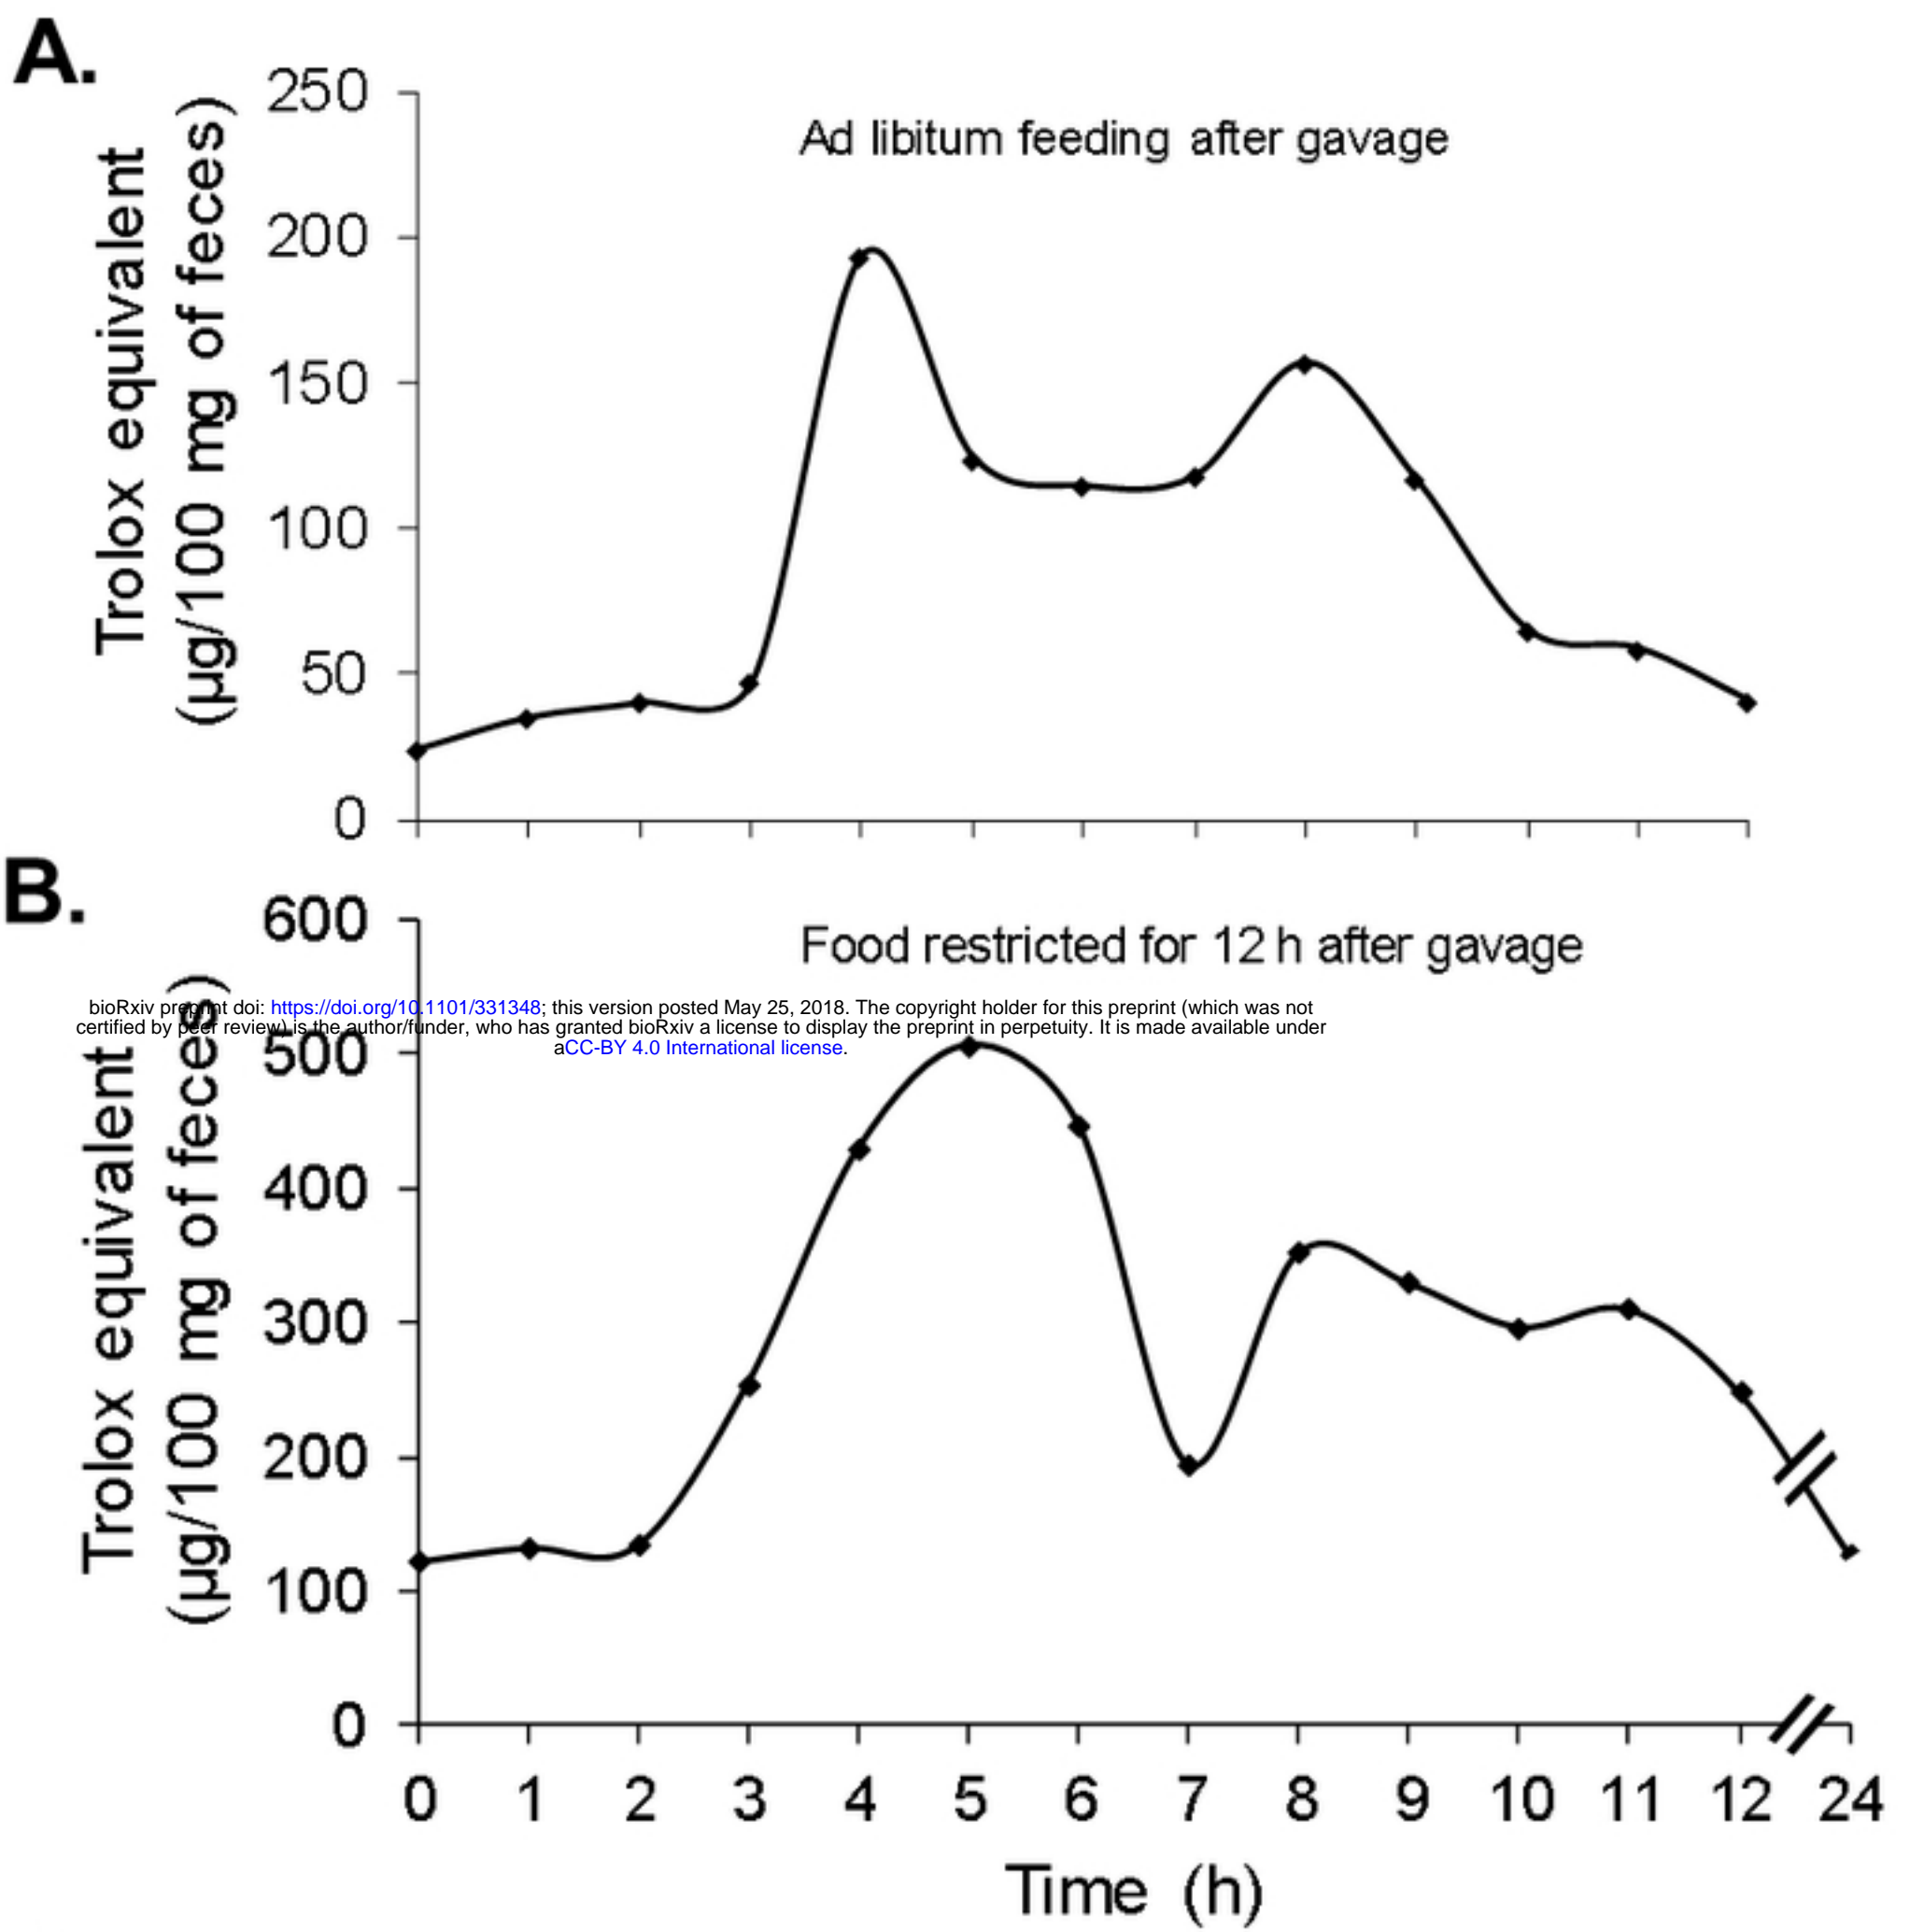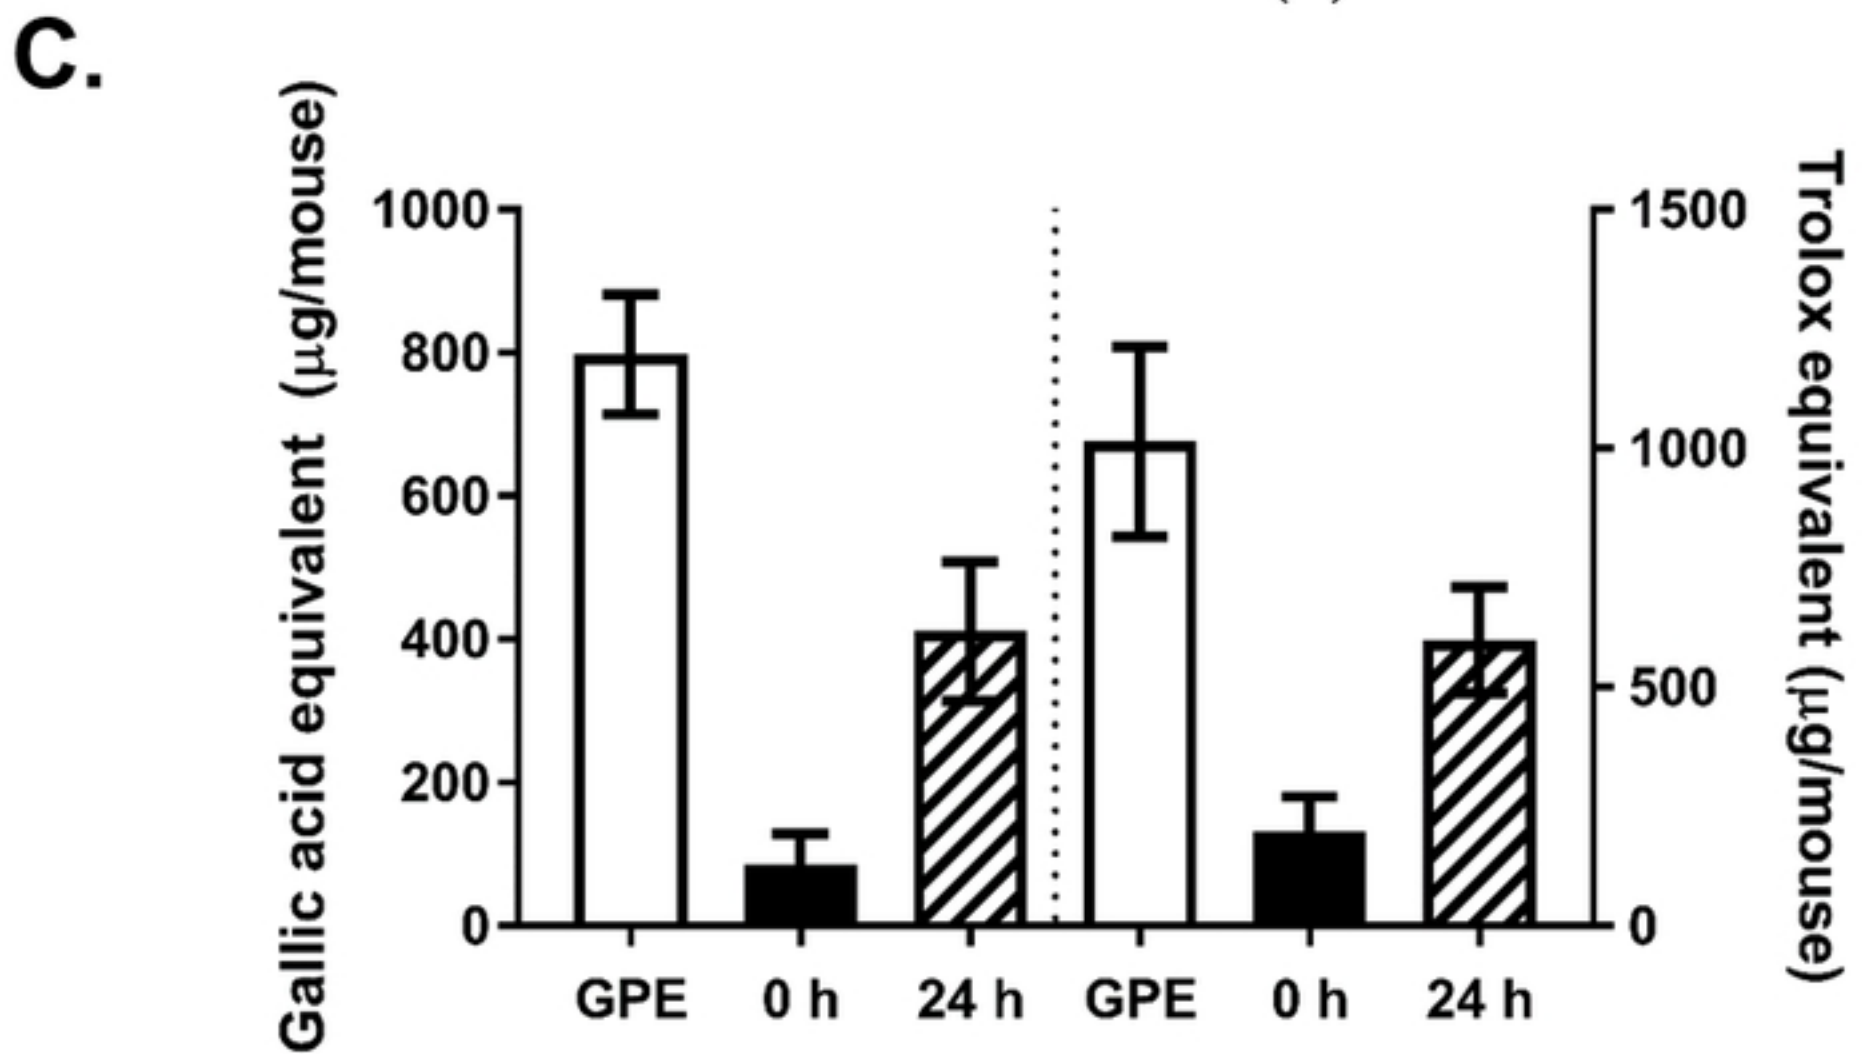

**A.**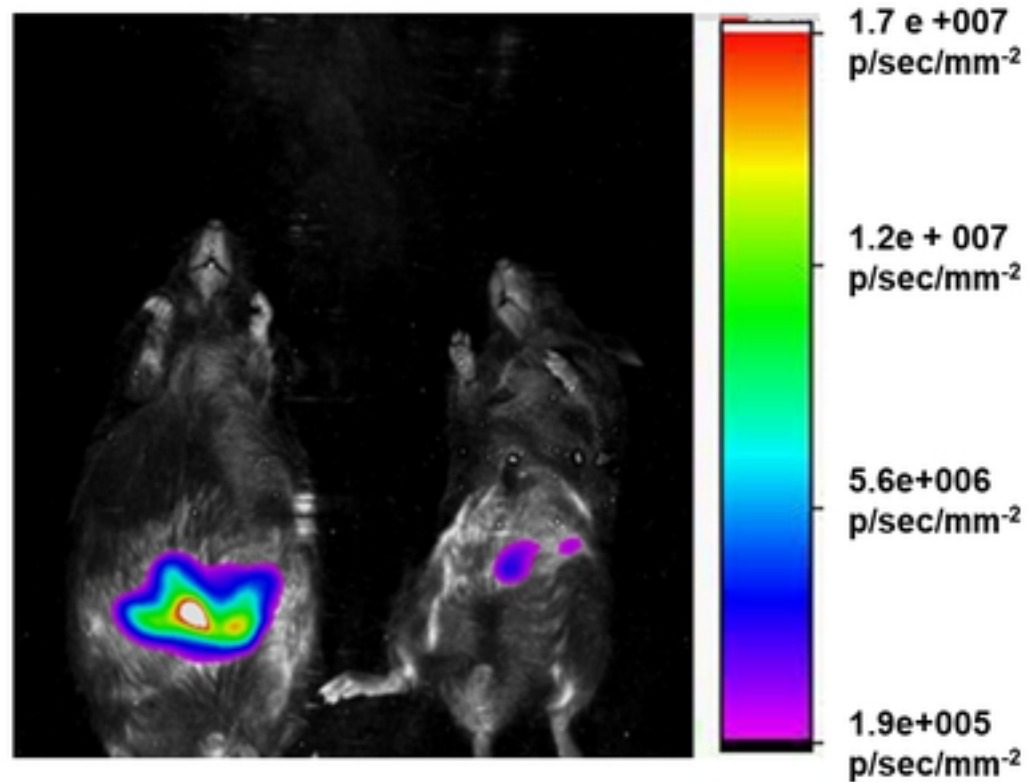**B.**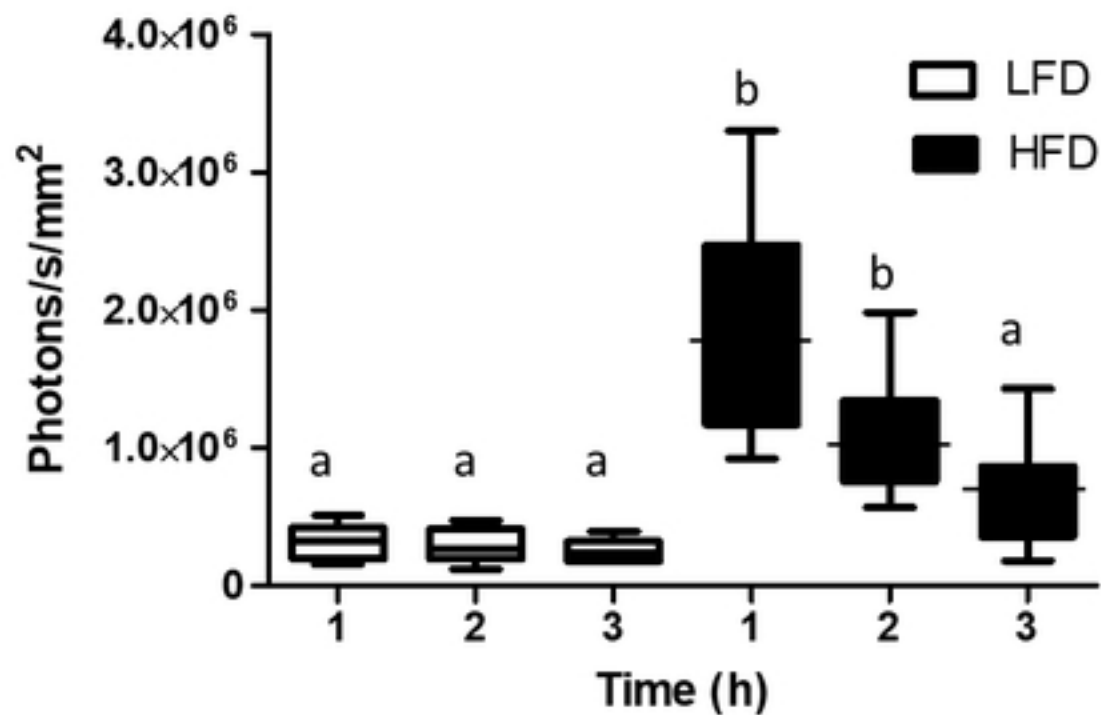

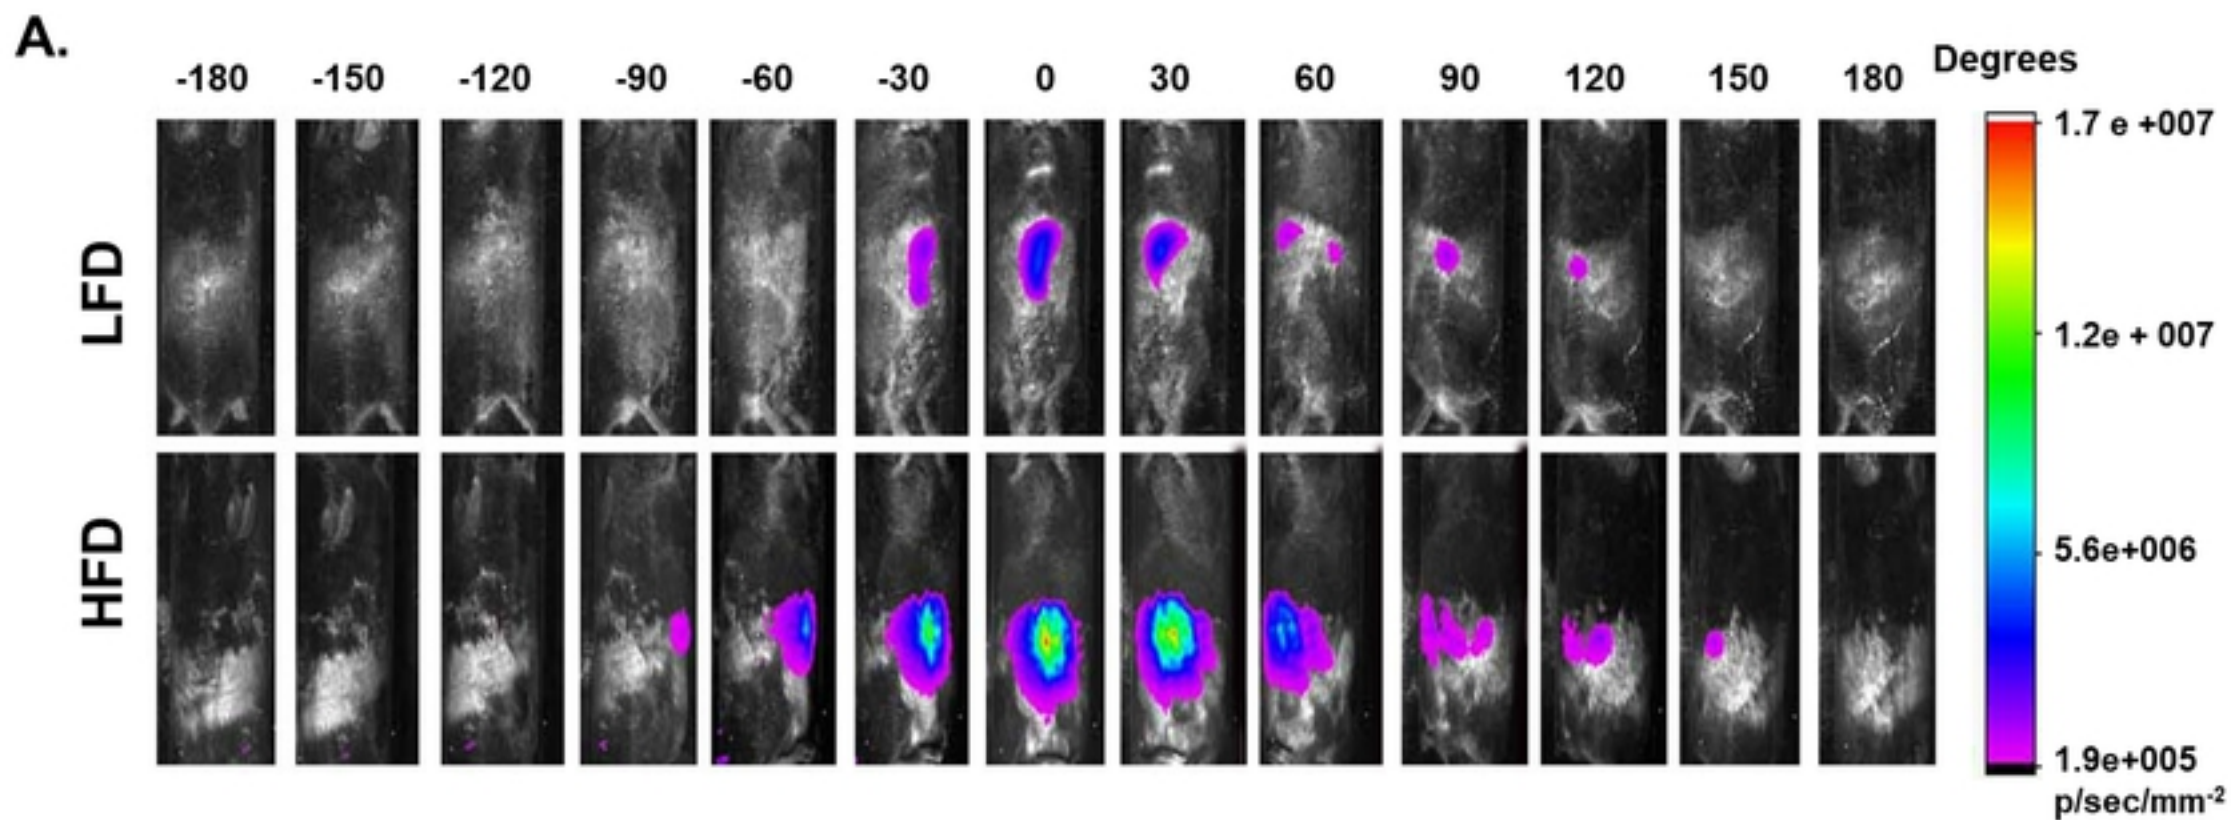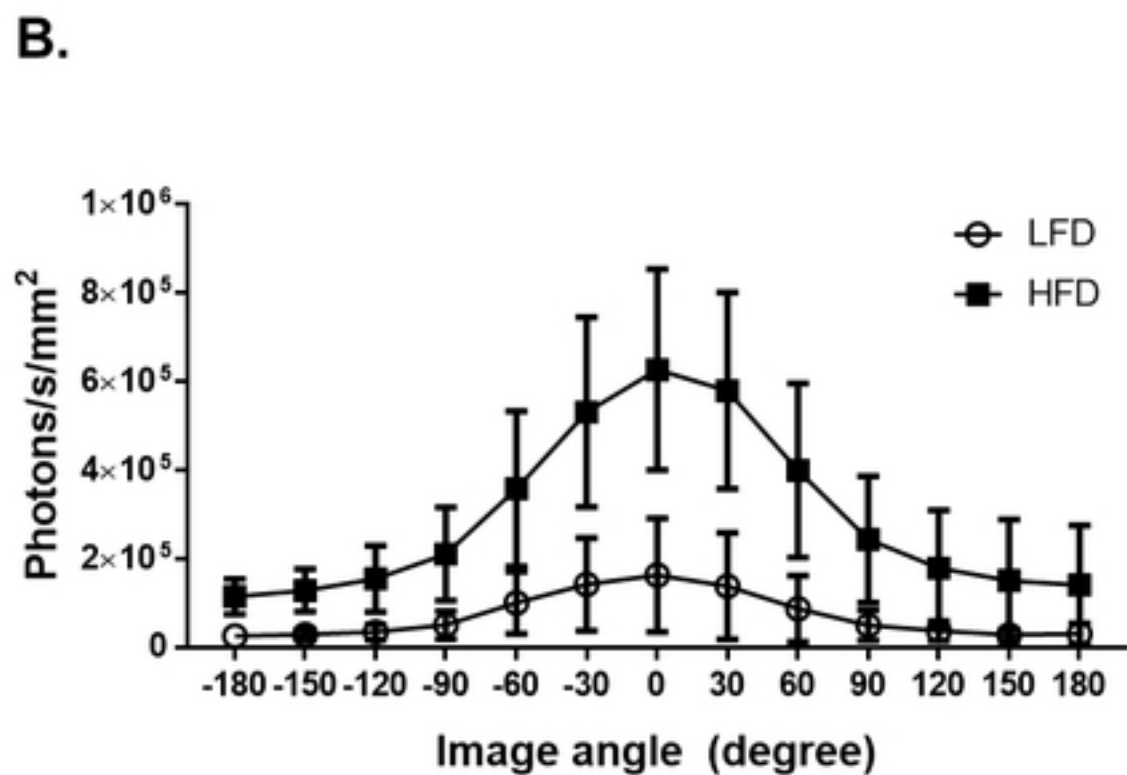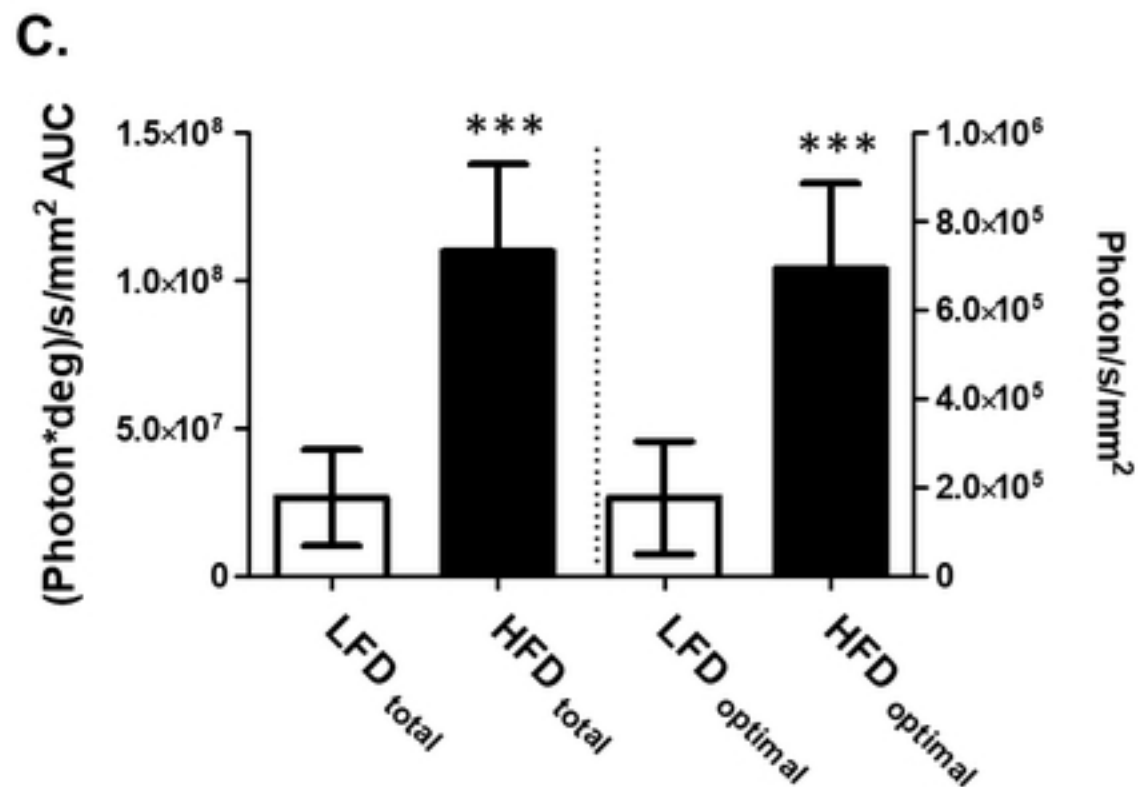

**A.**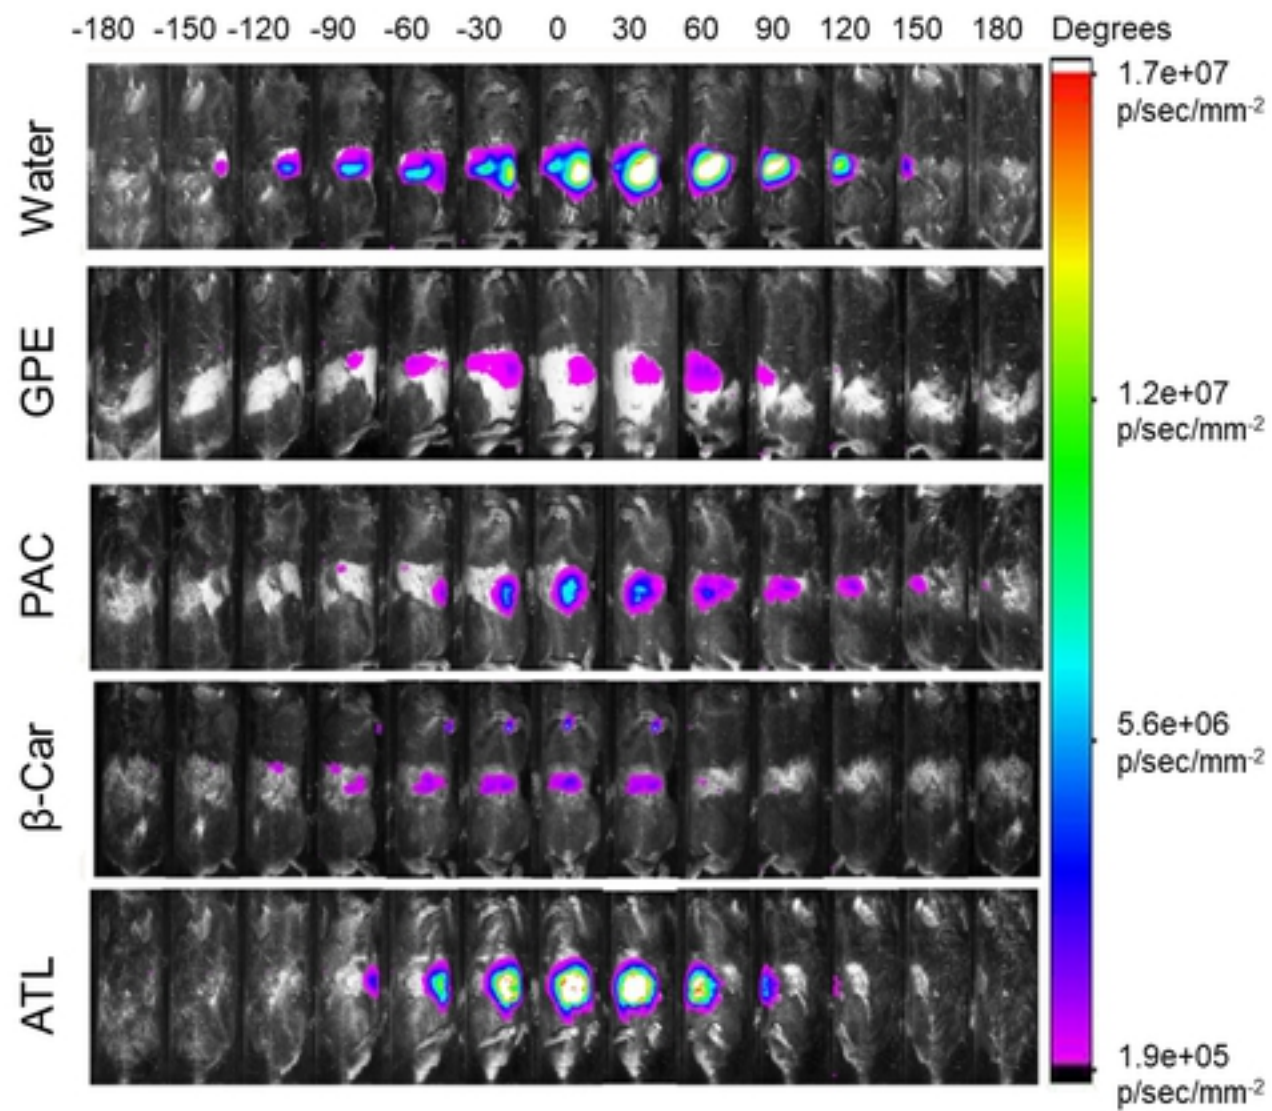**B.**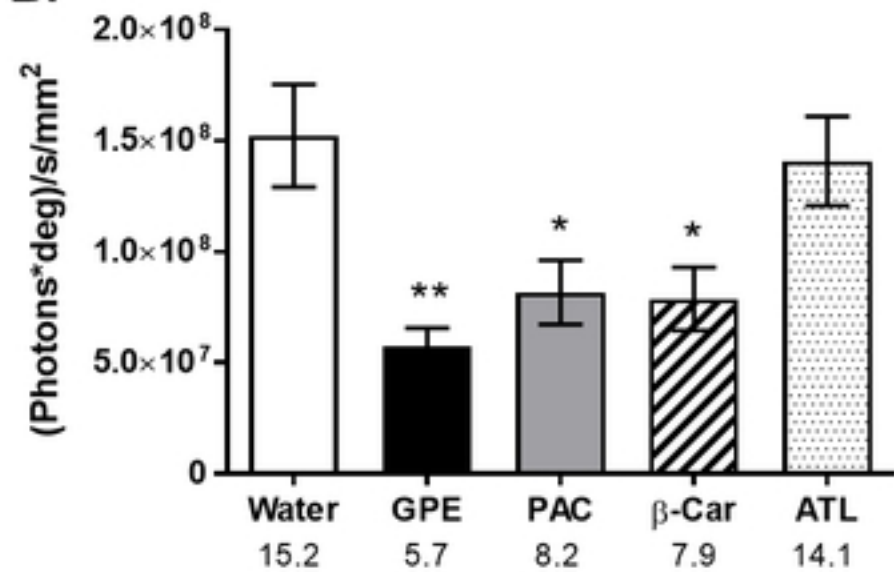

**A.**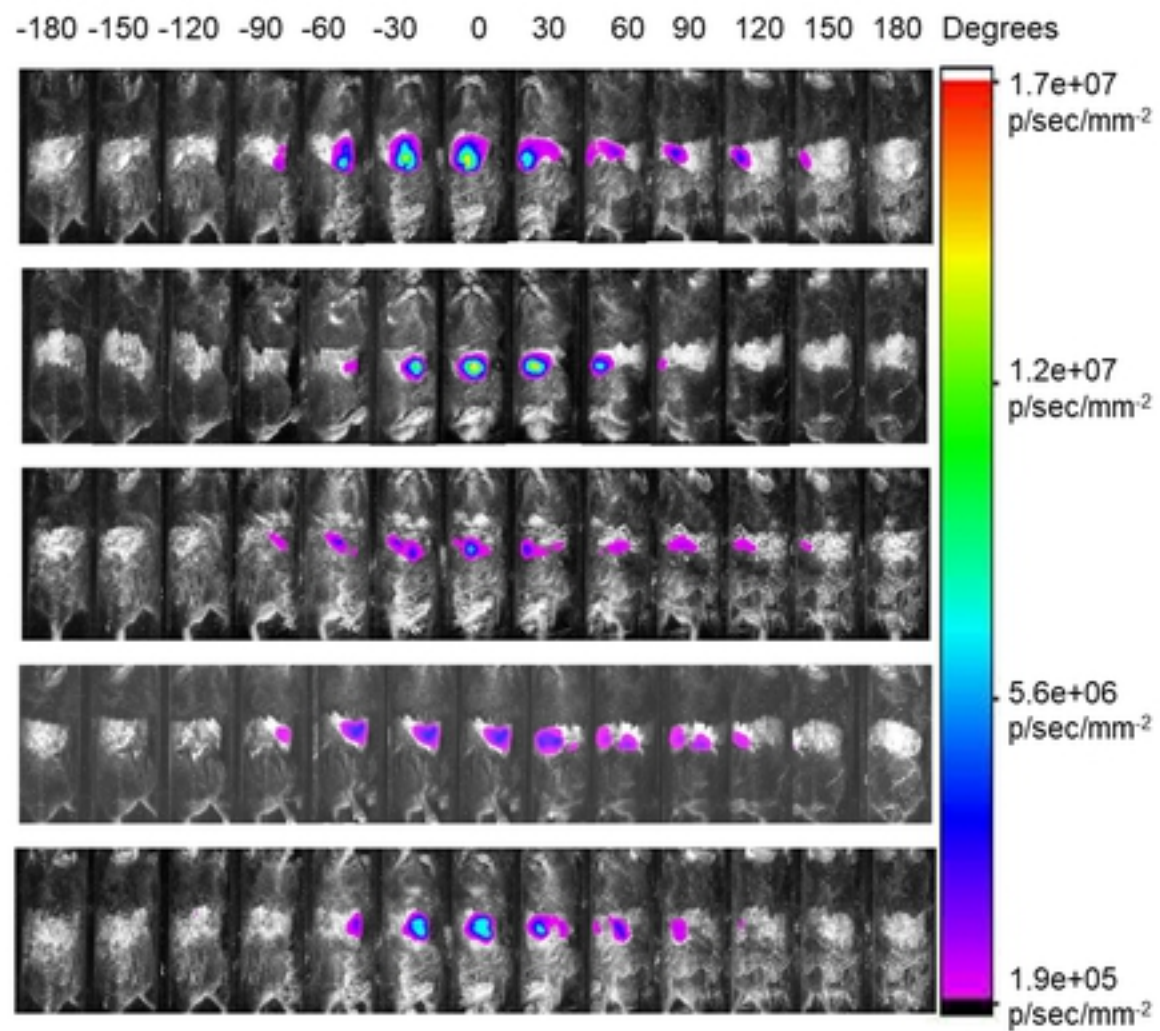**B.**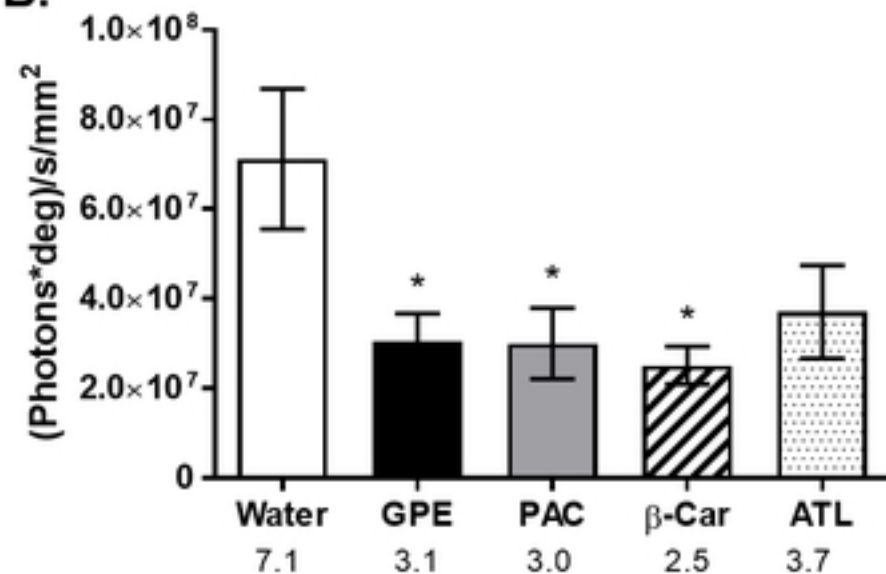

Source: http://biorxiv.org/content/10.1101/331348v1.full.pdf
